# Supplementary material for: Light distribution and thermal effects in the rat brain under optogenetic stimulation
Source: Wiley journal article supplement (doi:10.1002/jbio.201500106), 2015-07-20
Supplement: jbio201500106-sup-0001-author-biographies.pdf [file jbio201500106-sup-0001-author-biographies.pdf]

**Barbara Gysbrechts** graduated from the Department of Physics and Astronomy at the University of Leuven in 2011. Currently, she is a PhD student at the University of Leuven, working on the characterization of optical properties of the brain and modeling and measuring light propagation in the brain.

**Ling Wang** graduated and obtained his PhD at the Zhejiang University in China. Currently, he is a Senior Researcher at the University of Leuven. He is specialized in OCT, imaging system design and development, image processing, tissue spectroscopy, and fiber optics.

**Nghia Nguyen Do Trong** received his PhD from the University of Leuven in 2013 and is currently pursuing post doctoral research at the Department of Biosystems at this university. His research is mainly focused on the characterization of the optical properties of turbid media using spatially resolved spectroscopy.

**Henrique Cabral** obtained a PhD in the field of neuroscience at the University of Amsterdam. He continued his research at the Neuro-Electronics Research Center of Flanders, focusing on the development optogenetic techniques combined with electrophysiology measurement.

**Zaneta Navratilova** received her PhD in Neuroscience from the University of Arizona and is currently conducting postdoctoral research at the Donders Centre for Neuroscience in the Netherlands. She investigates the neural networks involved in spatial navigation and memory.

**Francesco Battaglia** is an Associate Professor at the Donders Centre for Neuroscience, at the Radboud University in the Netherlands. From his undergraduate and graduate studies, he has a background in theoretical physics and computational neuroscience. During his Post-Doc in Tucson, he was initiated to experimental neurophysiology and now he is combining his theoretical and experimental inclinations to study mainly the hippocampus.

**Wouter Saeys** obtained his PhD at the University of Leuven, Belgium, and became an Assistant Professor in 2010 at the Department of Biosystems of this university. His research interests focus on characterization of optical properties of biomaterials, light transport modeling, and agricultural robotics.

**Carmen Bartic** is Professor at the Department of Physics and Astronomy at the University of Leuven since 2007. Before, she was leading the group of Bio-electronic Systems at Imec, Belgium, for 5 years. Carmen Bartic has developed a strong background in a plethora of biophysical techniques and applications, such as: neuro-electronics, biomaterials, and implantable devices for brain stimulation and recording.
